# Supplementary material for: Flexible, Wearable and Fully-printed Smart Patch for pH and Hydration Sensing in Wounds
Source: PubMed Central journal article supplement — Int J Bioprint. 2021 Dec 16;8(1):447. doi: 10.18063/ijb.v8i1.447 (PMC8852199; doi:10.18063/ijb.v8i1.447), 2021-12-16
Supplement: IJB-8-1-447-s001.pdf [file IJB-8-1-447-s001.pdf]

## Supplementary files

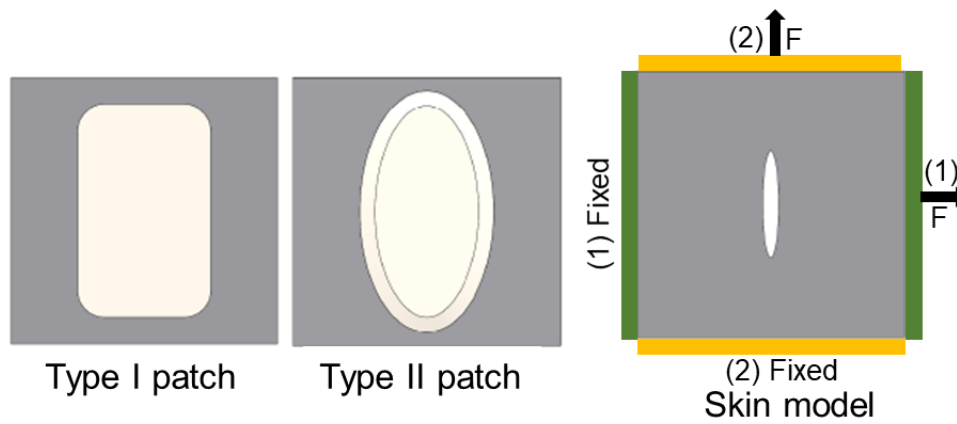

**Figure S1.** Models used in FEA studies for the patch design and illustration of the skin model with fixtures and loads applied in two directions used on all models of FEA.

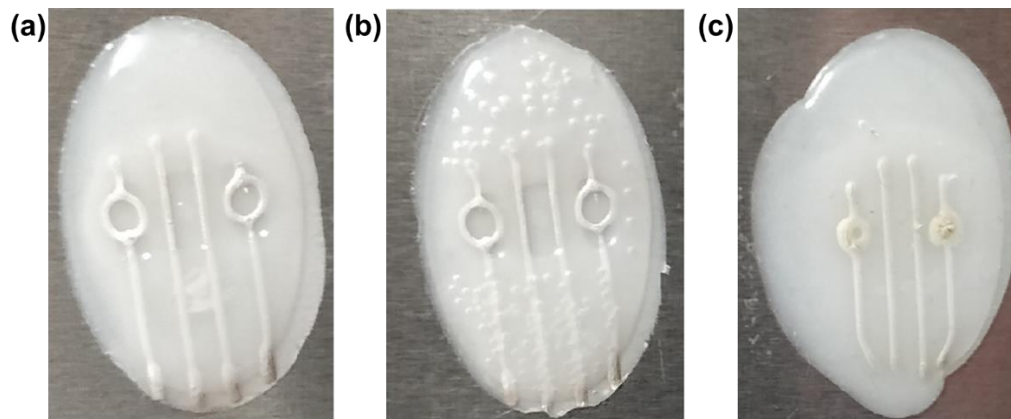

**Figure S2.** Printed top layers with (a) 20 wt%, (b) 15 wt%, and (c) 15 wt%  $\text{SiO}_2$  NPs. The substrates were allowed to cure at room temperature,  $50^\circ\text{C}$ , and room temperature, respectively.

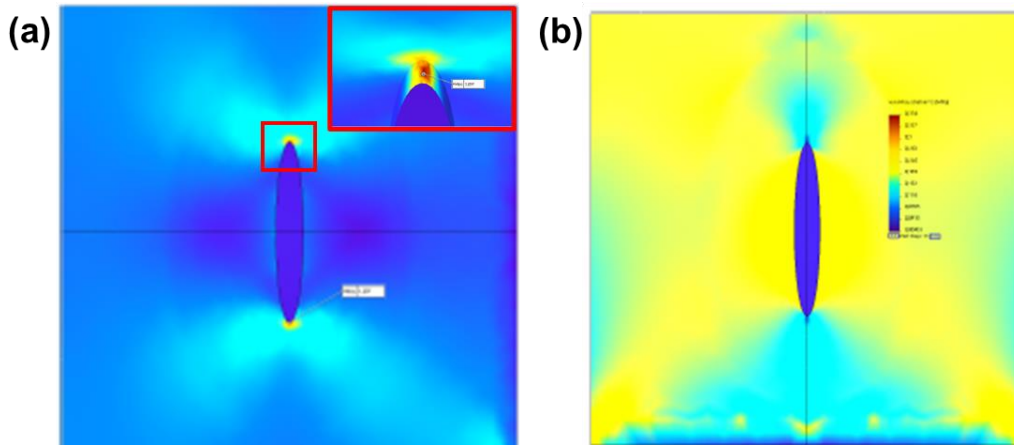

**Figure S3.** Von mises stress plot, where the maximum stress is indicated with a value box. The force is applied in the (a) horizontal and (b) vertical directions.

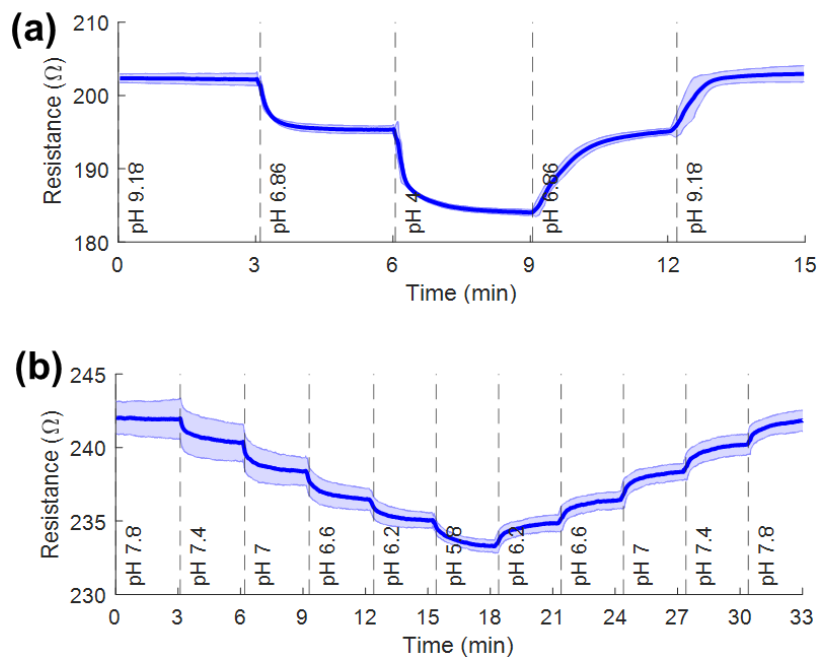

**Figure S4.** Mean values of measured resistance for different buffer solutions with 3 minutes intervals.
